# Supplementary material
Source: publisher figshare collection journal article supplement (https://acs.figshare.com/ndownloader/files/4585531)
Supplement: Supplementary file 1 [file 4585531]

 
data_1 
 
_audit_creation_method            SHELXL-97 
_chemical_name_systematic 
; 
 ? 
; 
_chemical_name_common             ? 
_chemical_melting_point           ? 
_chemical_formula_moiety          ? 
_chemical_formula_sum 
 'C162 H174 Co9 N72 O48' 
_chemical_formula_weight          4428.10 
 
loop_ 
 _atom_type_symbol 
 _atom_type_description 
 _atom_type_scat_dispersion_real 
 _atom_type_scat_dispersion_imag 
 _atom_type_scat_source 
 'C'  'C'   0.0033   0.0016 
 'International Tables Vol C Tables 4.2.6.8 and 6.1.1.4' 
 'H'  'H'   0.0000   0.0000 
 'International Tables Vol C Tables 4.2.6.8 and 6.1.1.4' 
 'N'  'N'   0.0061   0.0033 
 'International Tables Vol C Tables 4.2.6.8 and 6.1.1.4' 
 'O'  'O'   0.0106   0.0060 
 'International Tables Vol C Tables 4.2.6.8 and 6.1.1.4' 
 'Co'  'Co'   0.3494   0.9721 
 'International Tables Vol C Tables 4.2.6.8 and 6.1.1.4' 
 
_symmetry_cell_setting            cubic 
_symmetry_space_group_name_H-M    Im-3
 
loop_ 
 _symmetry_equiv_pos_as_xyz 
 'x, y, z' 
 '-x, -y, z' 
 '-x, y, -z' 
 'x, -y, -z' 
 'z, x, y' 
 'z, -x, -y' 
 '-z, -x, y' 
 '-z, x, -y' 
 'y, z, x' 
 '-y, z, -x' 
 'y, -z, -x' 
 '-y, -z, x' 
 'x+1/2, y+1/2, z+1/2' 
 '-x+1/2, -y+1/2, z+1/2' 
 '-x+1/2, y+1/2, -z+1/2' 
 'x+1/2, -y+1/2, -z+1/2' 
 'z+1/2, x+1/2, y+1/2' 
 'z+1/2, -x+1/2, -y+1/2' 
 '-z+1/2, -x+1/2, y+1/2' 
 '-z+1/2, x+1/2, -y+1/2' 
 'y+1/2, z+1/2, x+1/2' 
 '-y+1/2, z+1/2, -x+1/2' 
 'y+1/2, -z+1/2, -x+1/2' 
 '-y+1/2, -z+1/2, x+1/2' 
 '-x, -y, -z' 
 'x, y, -z' 
 'x, -y, z' 
 '-x, y, z' 
 '-z, -x, -y' 
 '-z, x, y' 
 'z, x, -y' 
 'z, -x, y' 
 '-y, -z, -x' 
 'y, -z, x' 
 '-y, z, x' 
 'y, z, -x' 
 '-x+1/2, -y+1/2, -z+1/2' 
 'x+1/2, y+1/2, -z+1/2' 
 'x+1/2, -y+1/2, z+1/2' 
 '-x+1/2, y+1/2, z+1/2' 
 '-z+1/2, -x+1/2, -y+1/2' 
 '-z+1/2, x+1/2, y+1/2' 
 'z+1/2, x+1/2, -y+1/2' 
 'z+1/2, -x+1/2, y+1/2' 
 '-y+1/2, -z+1/2, -x+1/2' 
 'y+1/2, -z+1/2, x+1/2' 
 '-y+1/2, z+1/2, x+1/2' 
 'y+1/2, z+1/2, -x+1/2' 
 
_cell_length_a                    21.3548(17) 
_cell_length_b                    21.3548(17) 
_cell_length_c                    21.3548(17) 
_cell_angle_alpha                 90.00 
_cell_angle_beta                  90.00 
_cell_angle_gamma                 90.00 
_cell_volume                      9738.4(13) 
_cell_formula_units_Z             2 
_cell_measurement_temperature     293(2) 
_cell_measurement_reflns_used     1734
_cell_measurement_theta_min       1.35 
_cell_measurement_theta_max       25.96
 
_exptl_crystal_description        block 
_exptl_crystal_colour             red
_exptl_crystal_size_max           0.26 
_exptl_crystal_size_mid           0.23 
_exptl_crystal_size_min           0.23 
_exptl_crystal_density_meas       ? 
_exptl_crystal_density_diffrn     1.510 
_exptl_crystal_density_method     'not measured' 
_exptl_crystal_F_000              4554 
_exptl_absorpt_coefficient_mu     0.843 
_exptl_absorpt_correction_type    'multi-scan'
_exptl_absorpt_correction_T_min   0.8119 
_exptl_absorpt_correction_T_max   0.8330 
_exptl_absorpt_process_details    SADABS 
 
_exptl_special_details 
; 
 ? 
; 
 
_diffrn_ambient_temperature       293(2) 
_diffrn_radiation_wavelength      0.71073 
_diffrn_radiation_type            MoK\a 
_diffrn_radiation_source          'fine-focus sealed tube' 
_diffrn_radiation_monochromator   graphite 
_diffrn_measurement_device_type   'Bruker Smart Apex CCD area detector' 
_diffrn_measurement_method        'phi and omega scans' 
_diffrn_detector_area_resol_mean  ? 
_diffrn_standards_number          ? 
_diffrn_standards_interval_count  ? 
_diffrn_standards_interval_time   ? 
_diffrn_standards_decay_%         negligible 
_diffrn_reflns_number             9596 
_diffrn_reflns_av_R_equivalents   0.0578 
_diffrn_reflns_av_sigmaI/netI     0.0438 
_diffrn_reflns_limit_h_min        -14 
_diffrn_reflns_limit_h_max        26 
_diffrn_reflns_limit_k_min        -26 
_diffrn_reflns_limit_k_max        10 
_diffrn_reflns_limit_l_min        -26 
_diffrn_reflns_limit_l_max        8 
_diffrn_reflns_theta_min          1.35 
_diffrn_reflns_theta_max          25.96 
_reflns_number_total              1734 
_reflns_number_gt                 1277 
_reflns_threshold_expression      >2sigma(I) 
 
_computing_data_collection        ? 
_computing_cell_refinement        ? 
_computing_data_reduction         ? 
_computing_structure_solution     'SHELXS-97 (Sheldrick, 1990)' 
_computing_structure_refinement   'SHELXL-97 (Sheldrick, 1997)' 
_computing_molecular_graphics     ? 
_computing_publication_material   ? 
 
_refine_special_details 
; 
 Refinement of F^2^ against ALL reflections.  The weighted R-factor wR and 
 goodness of fit S are based on F^2^, conventional R-factors R are based 
 on F, with F set to zero for negative F^2^. The threshold expression of 
 F^2^ > 2sigma(F^2^) is used only for calculating R-factors(gt) etc. and is 
 not relevant to the choice of reflections for refinement.  R-factors based 
 on F^2^ are statistically about twice as large as those based on F, and R- 
 factors based on ALL data will be even larger. 
; 
 
_refine_ls_structure_factor_coef  Fsqd  
_refine_ls_matrix_type            full 
_refine_ls_weighting_scheme       calc  
_refine_ls_weighting_details 
 'calc w=1/[\s^2^(Fo^2^)+(0.1353P)^2^+22.6733P] where P=(Fo^2^+2Fc^2^)/3' 
_atom_sites_solution_primary      direct 
_atom_sites_solution_secondary    difmap 
_atom_sites_solution_hydrogens    geom 
_refine_ls_hydrogen_treatment     constr 
_refine_ls_extinction_method      none 
_refine_ls_extinction_coef        ? 
_refine_ls_number_reflns          1734 
_refine_ls_number_parameters      130 
_refine_ls_number_restraints      0 
_refine_ls_R_factor_all           0.0890 
_refine_ls_R_factor_gt            0.0658 
_refine_ls_wR_factor_ref          0.2115 
_refine_ls_wR_factor_gt           0.1925 
_refine_ls_goodness_of_fit_ref    1.012 
_refine_ls_restrained_S_all       1.012 
_refine_ls_shift/su_max           0.001 
_refine_ls_shift/su_mean          0.000 
 
loop_ 
 _atom_site_label 
 _atom_site_type_symbol 
 _atom_site_fract_x 
 _atom_site_fract_y 
 _atom_site_fract_z 
 _atom_site_U_iso_or_equiv 
 _atom_site_adp_type 
 _atom_site_occupancy 
 _atom_site_symmetry_multiplicity 
 _atom_site_calc_flag 
 _atom_site_refinement_flags 
 _atom_site_disorder_assembly 
 _atom_site_disorder_group 
Co1 Co 0.14809(3) 0.14809(3) 0.14809(3) 0.0299(4) Uani 1 3 d S . . 
Co2 Co 0.0000 0.0000 0.0000 0.0413(8) Uani 1 24 d S . . 
C1 C 0.2187(2) 0.1232(2) 0.2748(2) 0.0463(12) Uani 1 1 d . . . 
H1A H 0.2545 0.1349 0.2529 0.056 Uiso 1 1 calc R . . 
C2 C 0.2249(2) 0.1026(3) 0.3356(3) 0.0561(14) Uani 1 1 d . . . 
H2A H 0.2642 0.1006 0.3544 0.067 Uiso 1 1 calc R . . 
C3 C 0.1728(3) 0.0852(3) 0.3677(3) 0.0623(16) Uani 1 1 d . . . 
H3A H 0.1760 0.0710 0.4088 0.075 Uiso 1 1 calc R . . 
C4 C 0.1152(2) 0.0887(3) 0.3391(2) 0.0530(13) Uani 1 1 d . . . 
H4A H 0.0789 0.0770 0.3602 0.064 Uiso 1 1 calc R . . 
C5 C 0.11252(19) 0.1099(2) 0.2780(2) 0.0342(10) Uani 1 1 d . . . 
C6 C 0.0522(2) 0.11666(19) 0.24394(19) 0.0322(9) Uani 1 1 d . . . 
C7 C 0.0000 0.1472(3) 0.1542(3) 0.0299(13) Uani 1 2 d S . . 
C8 C 0.0000 0.4085(6) 0.5000 0.057(3) Uani 1 4 d S . . 
N1 N 0.16345(17) 0.12727(17) 0.24583(17) 0.0354(9) Uani 1 1 d . . . 
N2 N 0.05586(15) 0.13431(15) 0.18469(15) 0.0294(8) Uani 1 1 d . . . 
N3 N 0.0000 0.1071(3) 0.2768(2) 0.0385(12) Uani 1 2 d S . . 
N4 N 0.0000 0.1705(2) 0.10128(18) 0.0220(10) Uani 1 2 d S . . 
H4B H -0.0365 0.1791 0.0820 0.026 Uiso 0.50 1 d PR . . 
O1W O 0.0000 0.0966(3) 0.0000 0.065(2) Uani 1 4 d S . . 
H1WA H 0.0000 0.1220 0.0322 0.06(2) Uiso 1 2 d SR . . 
O1 O 0.0000 0.3508(4) 0.5000 0.086(3) Uani 1 4 d S . . 
O2 O 0.0000 0.4394(3) 0.4496(3) 0.110(3) Uani 1 2 d S . . 
H2B H 0.0000 0.4796 0.4496 0.131 Uiso 0.50 2 d SPR . . 
O2W O 0.0000 0.2326(7) 0.5000 0.64(5) Uani 1 4 d S . . 
H2WA H 0.0000 0.2726 0.5000 0.961 Uiso 1 4 d SR . . 
H2WB H 0.0342 0.2114 0.5000 0.961 Uiso 0.50 2 d SPR . . 
O3W O 0.1074(5) 0.1670(4) 0.5000 0.142(4) Uani 1 2 d S . . 
H3WA H 0.0884 0.1320 0.5000 0.213 Uiso 1 2 d SR . . 
H3WB H 0.1469 0.1621 0.5000 0.213 Uiso 0.50 2 d SPR . . 
H3WC H 0.0860 0.2039 0.5000 0.213 Uiso 0.50 2 d SPR . . 
O4W O 0.0000 0.2511(8) 0.3321(9) 0.119(6) Uani 0.50 2 d SP . . 
H4WA H 0.0000 0.2200 0.3591 0.179 Uiso 0.50 2 d SPR . . 
H4WB H 0.0000 0.2464 0.2939 0.179 Uiso 0.50 2 d SPR . .
 
loop_ 
 _atom_site_aniso_label 
 _atom_site_aniso_U_11 
 _atom_site_aniso_U_22 
 _atom_site_aniso_U_33 
 _atom_site_aniso_U_23 
 _atom_site_aniso_U_13 
 _atom_site_aniso_U_12 
Co1 0.0299(4) 0.0299(4) 0.0299(4) 0.0000(2) 0.0000(2) 0.0000(2) 
Co2 0.0413(8) 0.0413(8) 0.0413(8) 0.000 0.000 0.000 
C1 0.037(3) 0.061(3) 0.041(3) -0.001(2) -0.006(2) 0.002(2) 
C2 0.047(3) 0.074(4) 0.047(3) 0.007(3) -0.020(3) 0.002(3) 
C3 0.058(3) 0.081(4) 0.047(3) 0.023(3) -0.008(3) 0.009(3) 
C4 0.050(3) 0.072(4) 0.038(3) 0.020(2) -0.006(2) 0.001(3) 
C5 0.036(2) 0.034(2) 0.033(2) 0.0030(18) -0.0063(19) -0.0004(19) 
C6 0.035(2) 0.029(2) 0.033(2) 0.0020(17) -0.0007(18) 0.0006(18) 
C7 0.027(3) 0.032(3) 0.031(3) -0.009(2) 0.000 0.000 
C8 0.048(6) 0.051(7) 0.072(8) 0.000 0.000 0.000 
N1 0.0336(19) 0.040(2) 0.0327(19) 0.0002(16) -0.0032(16) 0.0004(16) 
N2 0.0299(18) 0.0317(18) 0.0265(17) 0.0017(14) 0.0003(14) 0.0022(14) 
N3 0.033(3) 0.046(3) 0.036(3) 0.007(2) 0.000 0.000 
N4 0.016(2) 0.037(3) 0.012(2) 0.0090(18) 0.000 0.000 
O1W 0.120(7) 0.040(4) 0.035(4) 0.000 0.000 0.000 
O1 0.057(5) 0.070(6) 0.129(9) 0.000 0.000 0.000 
O2 0.207(9) 0.066(4) 0.056(4) -0.004(3) 0.000 0.000 
O3W 0.169(10) 0.081(5) 0.175(9) 0.000 0.000 -0.021(6) 
O4W 0.111(13) 0.097(12) 0.150(15) -0.060(11) 0.000 0.000 
O2W 0.110(14) 0.049(8) 1.76(15) 0.000 0.000 0.000 
 
_geom_special_details 
; 
 All esds (except the esd in the dihedral angle between two l.s. planes) 
 are estimated using the full covariance matrix.  The cell esds are taken 
 into account individually in the estimation of esds in distances, angles 
 and torsion angles; correlations between esds in cell parameters are only 
 used when they are defined by crystal symmetry.  An approximate (isotropic) 
 treatment of cell esds is used for estimating esds involving l.s. planes. 
; 
 
loop_ 
 _geom_bond_atom_site_label_1 
 _geom_bond_atom_site_label_2 
 _geom_bond_distance 
 _geom_bond_site_symmetry_2 
 _geom_bond_publ_flag 
Co1 N2 2.139(3) 9 ? 
Co1 N2 2.139(3) 5 ? 
Co1 N2 2.139(3) . ? 
Co1 N1 2.159(4) . ? 
Co1 N1 2.159(4) 9 ? 
Co1 N1 2.159(4) 5 ? 
Co2 O1W 2.062(7) 29 ? 
Co2 O1W 2.062(7) . ? 
Co2 O1W 2.062(7) 25 ? 
Co2 O1W 2.062(7) 5 ? 
Co2 O1W 2.062(7) 33 ? 
Co2 O1W 2.062(7) 9 ? 
C1 N1 1.334(6) . ? 
C1 C2 1.378(7) . ? 
C1 H1A 0.9300 . ? 
C2 C3 1.360(8) . ? 
C2 H2A 0.9300 . ? 
C3 C4 1.377(8) . ? 
C3 H3A 0.9300 . ? 
C4 C5 1.381(6) . ? 
C4 H4A 0.9300 . ? 
C5 N1 1.339(5) . ? 
C5 C6 1.487(6) . ? 
C6 N2 1.323(5) . ? 
C6 N3 1.333(5) . ? 
C7 N4 1.235(7) . ? 
C7 N2 1.386(4) . ? 
C7 N2 1.386(4) 28 ? 
C8 O1 1.232(14) . ? 
C8 O2 1.263(9) 26_556 ? 
C8 O2 1.263(9) . ? 
N3 C6 1.333(5) 28 ? 
N4 H4B 0.8999 . ? 
O1W H1WA 0.8765 . ? 
O2 H2B 0.8568 . ? 
O3W H3WA 0.8497 . ? 
O3W H3WB 0.8488 . ? 
O3W H3WC 0.9110 . ? 
O4W H4WA 0.8789 . ? 
O4W H4WB 0.8233 . ? 
O2W H2WA 0.8531 . ? 
O2W H2WB 0.8589 . ? 
 
loop_ 
 _geom_angle_atom_site_label_1 
 _geom_angle_atom_site_label_2 
 _geom_angle_atom_site_label_3 
 _geom_angle 
 _geom_angle_site_symmetry_1 
 _geom_angle_site_symmetry_3 
 _geom_angle_publ_flag 
N2 Co1 N2 105.06(10) 9 5 ? 
N2 Co1 N2 105.06(10) 9 . ? 
N2 Co1 N2 105.06(10) 5 . ? 
N2 Co1 N1 170.45(14) 9 . ? 
N2 Co1 N1 83.56(13) 5 . ? 
N2 Co1 N1 76.02(13) . . ? 
N2 Co1 N1 76.02(13) 9 9 ? 
N2 Co1 N1 170.45(14) 5 9 ? 
N2 Co1 N1 83.56(13) . 9 ? 
N1 Co1 N1 94.79(13) . 9 ? 
N2 Co1 N1 83.56(13) 9 5 ? 
N2 Co1 N1 76.02(13) 5 5 ? 
N2 Co1 N1 170.45(14) . 5 ? 
N1 Co1 N1 94.79(13) . 5 ? 
N1 Co1 N1 94.79(13) 9 5 ? 
O1W Co2 O1W 90.0 29 . ? 
O1W Co2 O1W 90.0 29 25 ? 
O1W Co2 O1W 180.0 . 25 ? 
O1W Co2 O1W 180.0 29 5 ? 
O1W Co2 O1W 90.0 . 5 ? 
O1W Co2 O1W 90.0 25 5 ? 
O1W Co2 O1W 90.0 29 33 ? 
O1W Co2 O1W 90.0 . 33 ? 
O1W Co2 O1W 90.0 25 33 ? 
O1W Co2 O1W 90.0 5 33 ? 
O1W Co2 O1W 90.0 29 9 ? 
O1W Co2 O1W 90.0 . 9 ? 
O1W Co2 O1W 90.0 25 9 ? 
O1W Co2 O1W 90.0 5 9 ? 
O1W Co2 O1W 180.0 33 9 ? 
N1 C1 C2 122.9(5) . . ? 
N1 C1 H1A 118.6 . . ? 
C2 C1 H1A 118.6 . . ? 
C3 C2 C1 118.9(5) . . ? 
C3 C2 H2A 120.5 . . ? 
C1 C2 H2A 120.5 . . ? 
C2 C3 C4 119.5(5) . . ? 
C2 C3 H3A 120.2 . . ? 
C4 C3 H3A 120.2 . . ? 
C3 C4 C5 118.3(5) . . ? 
C3 C4 H4A 120.9 . . ? 
C5 C4 H4A 120.9 . . ? 
N1 C5 C4 122.8(4) . . ? 
N1 C5 C6 115.2(4) . . ? 
C4 C5 C6 122.0(4) . . ? 
N2 C6 N3 126.7(4) . . ? 
N2 C6 C5 116.4(4) . . ? 
N3 C6 C5 116.9(4) . . ? 
N4 C7 N2 120.6(3) . . ? 
N4 C7 N2 120.6(3) . 28 ? 
N2 C7 N2 118.7(5) . 28 ? 
O1 C8 O2 121.6(6) . 26_556 ? 
O1 C8 O2 121.6(6) . . ? 
O2 C8 O2 116.9(11) 26_556 . ? 
C1 N1 C5 117.5(4) . . ? 
C1 N1 Co1 126.5(3) . . ? 
C5 N1 Co1 115.5(3) . . ? 
C6 N2 C7 117.0(4) . . ? 
C6 N2 Co1 116.3(3) . . ? 
C7 N2 Co1 126.4(3) . . ? 
C6 N3 C6 113.4(5) 28 . ? 
C7 N4 H4B 120.0 . . ? 
Co2 O1W H1WA 128.3 . . ? 
C8 O2 H2B 121.6 . . ? 
H3WA O3W H3WB 111.4 . . ? 
H3WA O3W H3WC 121.4 . . ? 
H3WB O3W H3WC 127.3 . . ? 
H4WA O4W H4WB 123.9 . . ? 
H2WA O2W H2WB 121.9 . . ? 
 
loop_ 
 _geom_hbond_atom_site_label_D 
 _geom_hbond_atom_site_label_H 
 _geom_hbond_atom_site_label_A 
 _geom_hbond_distance_DH 
 _geom_hbond_distance_HA 
 _geom_hbond_distance_DA 
 _geom_hbond_angle_DHA 
 _geom_hbond_site_symmetry_A 
O1W H1WA N4  0.88 1.80 2.678(6) 176.7 . 
O2 H2B O2  0.86 1.73 2.586(14) 180.0 2_565 
O3W H3WB O4W  0.85 2.18 3.02(2) 169.6 45 
O3W H3WA O2  0.85 1.84 2.684(11) 170.3 45 
O3W H3WC O2W  0.91 1.94 2.688(13) 138.6 . 
O2W H2WA O1  0.85 1.67 2.524(18) 180.0 . 
 
_diffrn_measured_fraction_theta_max    0.998 
_diffrn_reflns_theta_full              25.96 
_diffrn_measured_fraction_theta_full   0.998 
_refine_diff_density_max    0.897 
_refine_diff_density_min   -0.647 
_refine_diff_density_rms    0.098 
